# Supplementary material
Source: ML conference proceedings conference paper supplement (https://openreview.net/forum?id=Pq8FBz0gZHY)
Supplement: supplementary_material [file attachment]

## A Appendix of Generating Datasets of 3D Garments with Sewing Patterns

### A.1 Sewing Pattern Templates of the Dataset

This section presents the visualizations of all garment templates used to generate our dataset. Figures A1 and A2 demonstrate templates that compose the training and the test groups. To give the idea of the design distributions encoded by each template, we present samples at the extremes of the design distribution, which show the garment elements that are changing and the ranges of these changes. Note that parameters are independent of each other. Hence, samples in the dataset may exhibit any combinations of parameter values within defined ranges.

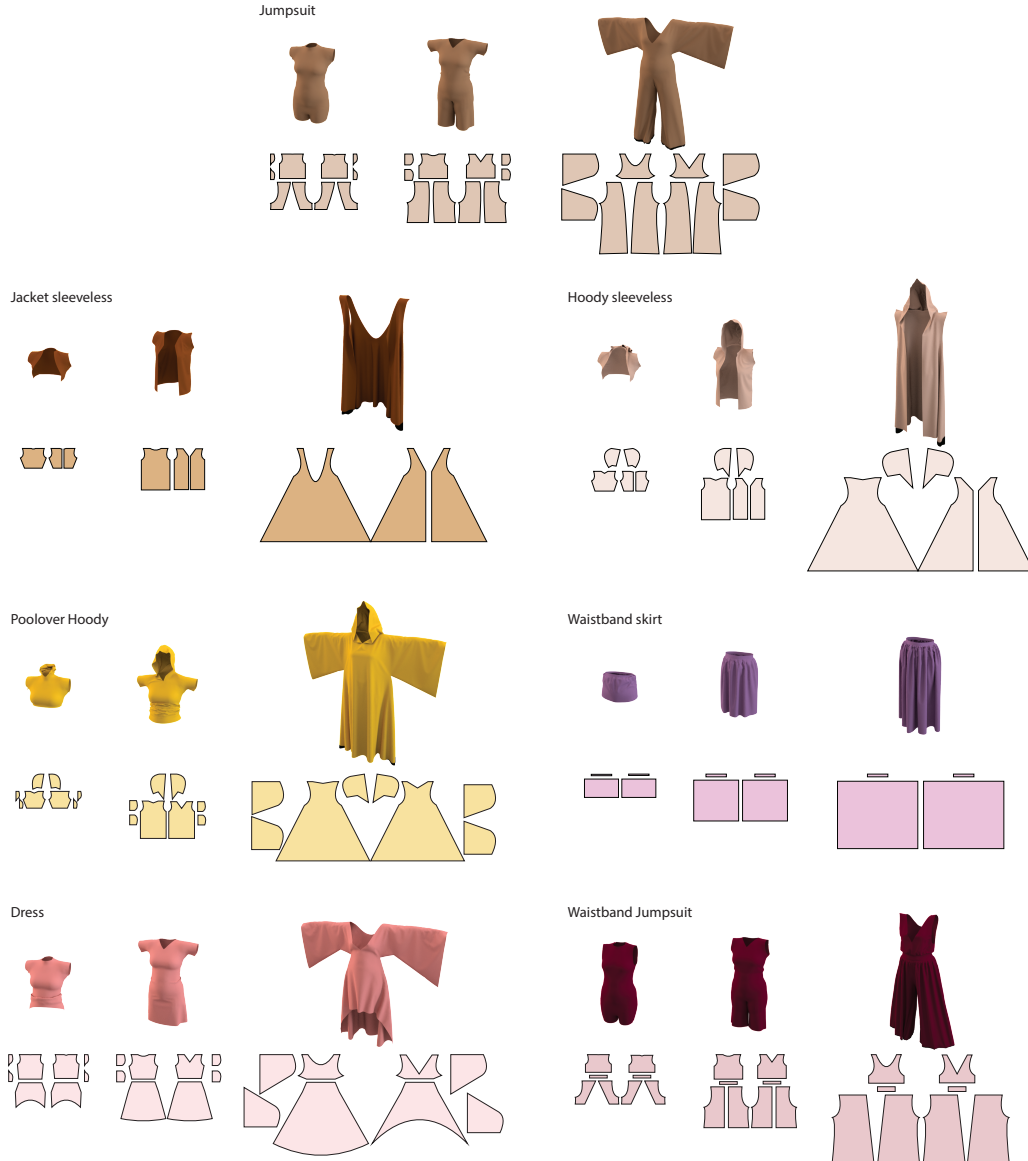

Figure A1: A total of seven garment templates of the test group. Presented as a base garment design (middle of each group) and its extreme variations – with most parameters set to minimum values (left) and most parameters set to maximum values (right).

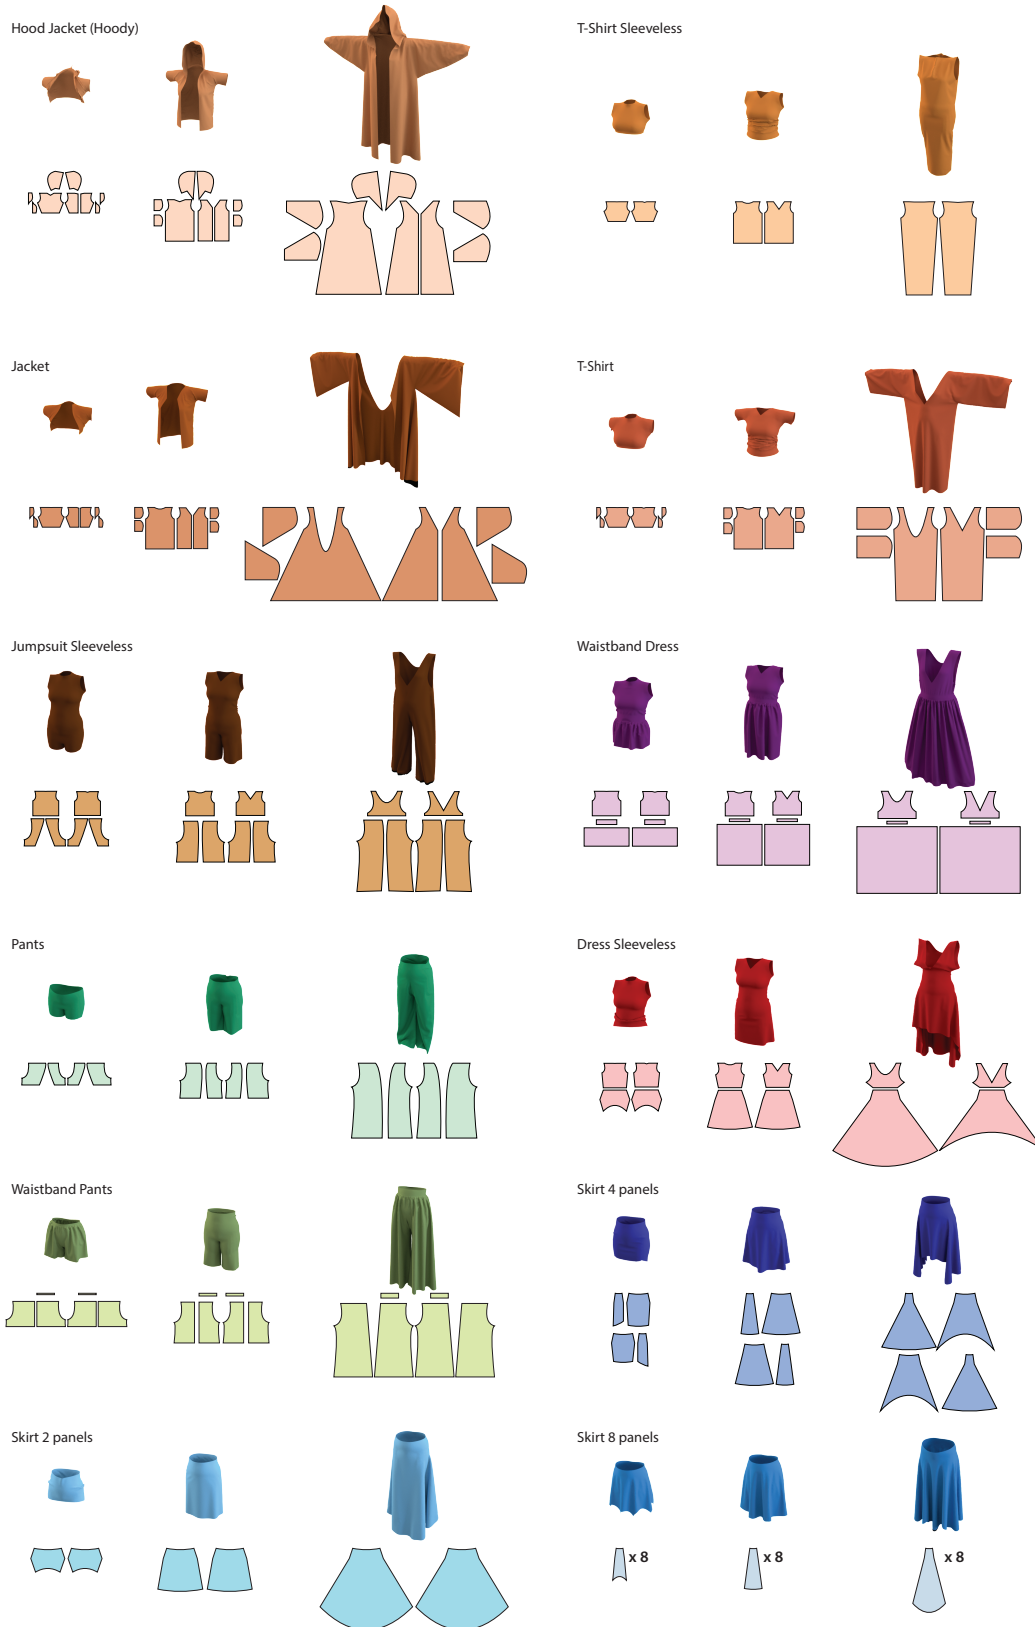

Figure A2: A total of 12 garment templates of the training group. Presented as a base garment design (middle of each group) and its extreme variations – with most parameters set to minimum values (left) and most parameters set to maximum values (right).
